# Supplementary material for: Deep Learning-Based Muscle Segmentation and Quantification of Full-Leg Plain Radiograph for Sarcopenia Screening in Patients Undergoing Total Knee Arthroplasty
Source: MDPI journal article supplement (doi:10.3390/jcm11133612), 2022-06-22
Supplement: s1 [file s1]

**Table S1. Baseline characteristics and sarcopenia markers of sarcopenic and non-sarcopenic patients.**

| Characteristics                                  | All patients<br>(N=403) | Sarcopenic<br>(N=34) | Normal<br>(N=369) | <i>p</i> -value |
|--------------------------------------------------|-------------------------|----------------------|-------------------|-----------------|
| Demographics                                     |                         |                      |                   |                 |
| Age at surgery, year (SD)                        | 70.88 (6.59)            | 74.62 (6.52)         | 70.53 (6.50)      | <0.001          |
| Sex (%)                                          |                         |                      |                   |                 |
| Female                                           | 351 (87.1)              | 32 (94.1)            | 319 (86.4)        | 0.266           |
| Male                                             | 52 (12.9)               | 2 (5.9)              | 50 (13.6)         |                 |
| Height, cm (SD)                                  | 154.36 (6.58)           | 149.41 (5.88)        | 154.82 (6.46)     | <0.001          |
| Weight, kg (SD)                                  | 63.19 (9.30)            | 53.44 (8.43)         | 64.08 (8.86)      | <0.001          |
| BMI, kg/m <sup>2</sup> (SD)                      | 26.50 (3.26)            | 23.86 (3.36)         | 26.72 (3.16)      | <0.001          |
| Sarcopenia Markers                               |                         |                      |                   |                 |
| Predicted muscle volume,<br>cm <sup>3</sup> (SD) | 8296.4<br>(1660.9)      | 6972.4 (1354.6)      | 8418.4 (1634.8)   | <0.001          |
| Comorbidities                                    |                         |                      |                   |                 |
| ASA class                                        |                         |                      |                   | 0.197           |
| 0                                                | 7 ( 1.7)                | 1 ( 2.9)             | 6 (1.6)           |                 |
| 1                                                | 68 (16.9)               | 7 (20.6)             | 61 (16.5)         |                 |
| 2                                                | 304 (75.4)              | 22 (64.7)            | 282 (76.4)        |                 |
| 3                                                | 24 (6.0)                | 4 (11.8)             | 20 ( 5.4)         |                 |
| Hypertension (%)                                 | 154 (38.2)              | 8 (23.5)             | 146 (39.6)        | 0.068           |
| Diabetes mellitus (%)                            | 81 (20.1)               | 11 (32.4)            | 70 (19.0)         | 0.074           |

Values are shown as the mean ± standard deviation or number (%). Statistical significance was set at  $p < 0.05$ .

ASA, American society of anesthesia

**Table S2. Laboratory data of sarcopenic and non-sarcopenic patients.**

| Characteristics                      | All patients<br>(N=403) | Sarcopenic<br>(N=34) | Normal<br>(N=369) | <i>p</i> -value |
|--------------------------------------|-------------------------|----------------------|-------------------|-----------------|
| PT INR (SD)                          | 0.96 (0.06)             | 0.95 (0.04)          | 0.96 (0.07)       | 0.228           |
| Hemoglobin, g/dL (SD)                | 13.00 (1.74)            | 12.25 (1.15)         | 13.07 (1.77)      | 0.008           |
| Platelet count $\times /10^9$ L (SD) | 239.64 (57.86)          | 251.62 (51.00)       | 238.54 (58.39)    | 0.208           |
| ESR, mm/h (SD)                       | 18.56 (12.98)           | 15.71 (10.66)        | 18.82 (13.15)     | 0.180           |
| C-Reactive Protein, mg/dL (SD)       | 0.19 (0.47)             | 0.10 (0.11)          | 0.20 (0.49)       | 0.248           |
| Albumin, g/dL (SD)                   | 4.22 (0.35)             | 4.14 (0.25)          | 4.23 (0.36)       | 0.194           |
| Total Protein, mg/dL (SD)            | 7.02 (0.44)             | 6.73 (0.42)          | 7.05 (0.43)       | <0.001          |
| AST(GOT), mg/dL (SD)                 | 24.37 (13.86)           | 21.85 (4.43)         | 24.60 (14.41)     | 0.269           |
| ALT(GPT), mg/dL (SD)                 | 21.76 (11.28)           | 18.71 (8.10)         | 22.05 (11.50)     | 0.099           |
| Alkaline phosphatase, mg/dL (SD)     | 71.57 (22.91)           | 67.15 (21.46)        | 71.98 (23.03)     | 0.240           |
| Total Bilirubin, mg/dL (SD)          | 0.62 (0.24)             | 0.61 (0.25)          | 0.62 (0.24)       | 0.946           |
| BUN, mg/dL (SD)                      | 18.39 (6.01)            | 20.32 (10.24)        | 18.22 (5.45)      | 0.050           |
| Creatinine, mg/dL (SD)               | 0.79 (0.24)             | 0.79 (0.44)          | 0.79 (0.21)       | 0.953           |
| eGFR – CKD EPI (SD)                  | 80.13 (14.38)           | 79.62 (17.40)        | 80.18 (14.09)     | 0.828           |
| Sodium, mg/dL (SD)                   | 140.86 (7.30)           | 141.59 (1.84)        | 140.79 (7.60)     | 0.542           |
| Potassium, mg/dL (SD)                | 4.31 (0.43)             | 4.36 (0.41)          | 4.31 (0.43)       | 0.498           |
| Chloride, mg/dL (SD)                 | 105.01 (2.40)           | 105.06 (2.41)        | 105.00 (2.40)     | 0.896           |
| Total Calcium, mg/dL (SD)            | 9.22 (0.42)             | 9.27 (0.45)          | 9.21 (0.42)       | 0.431           |
| Phosphorus, mg/dL (SD)               | 3.67 (0.50)             | 3.68 (0.48)          | 3.67 (0.50)       | 0.934           |
| Uric acid, mg/dL (SD)                | 4.79 (1.21)             | 4.39 (1.27)          | 4.83 (1.20)       | 0.040           |
| Glucose, mg/dL (SD)                  | 123.56 (37.79)          | 129.18 (42.62)       | 123.05 (37.34)    | 0.366           |

Values are shown as the mean  $\pm$  standard deviation (SD). Statistical significance was set at  $p < 0.05$ .

ESR, Erythrocyte Sedimentation Rate; BUN, Blood Urea Nitrogen

**Table S3. Performance assessment of the model on Cohort A (training set) and Cohort B (test set).**

| <b>Population</b> | <b>DSC</b>           | <b>Mean IoU</b>      |
|-------------------|----------------------|----------------------|
| Cohort A          | 0.944 [0.936, 0.951] | 0.959 [0.959, 0.960] |
| 1 - fold          | 0.942                | 0.959                |
| 2 - fold          | 0.937                | 0.959                |
| 3 - fold          | 0.940                | 0.959                |
| 4 - fold          | 0.938                | 0.960                |
| 5 - fold          | 0.963                | 0.960                |
| Cohort B          | 0.913 [0.910, 0.916] | 0.926 [0.920, 0.931] |

The brackets indicate the 95% confidence interval. Dice Similarity Coefficient; IoU, Intersection-over-Union.
